# Supplementary material
Source: Springer Nature journal article supplement (https://www.springermedizin.de/resource/supplementary/12943_2009_631_MOESM12_ESM.pdf/9554442)

**a**

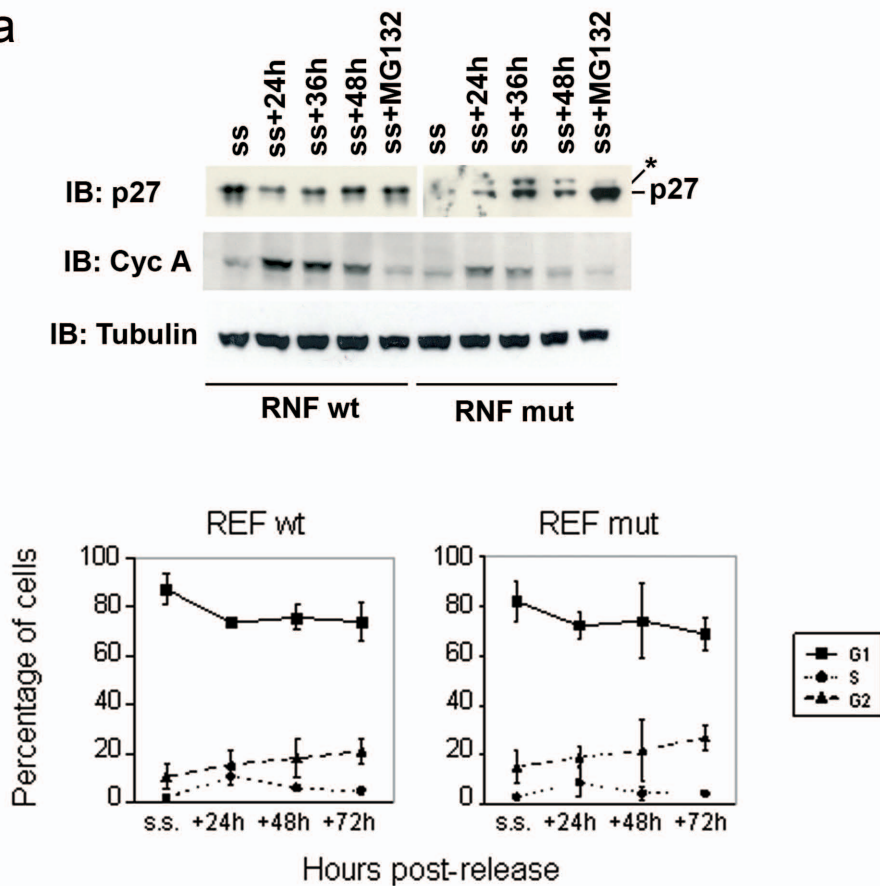

**b**

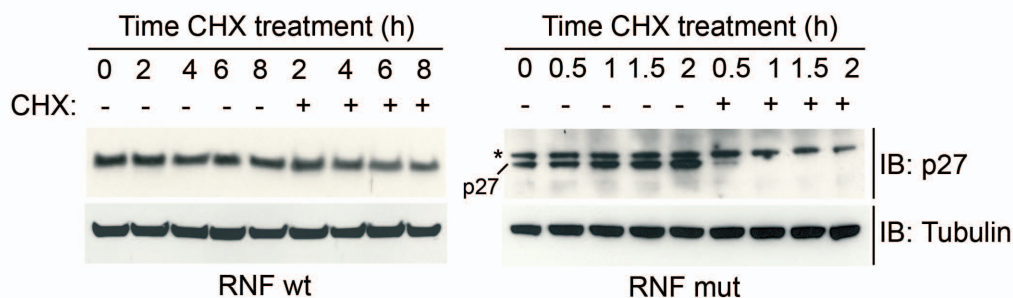

**c**

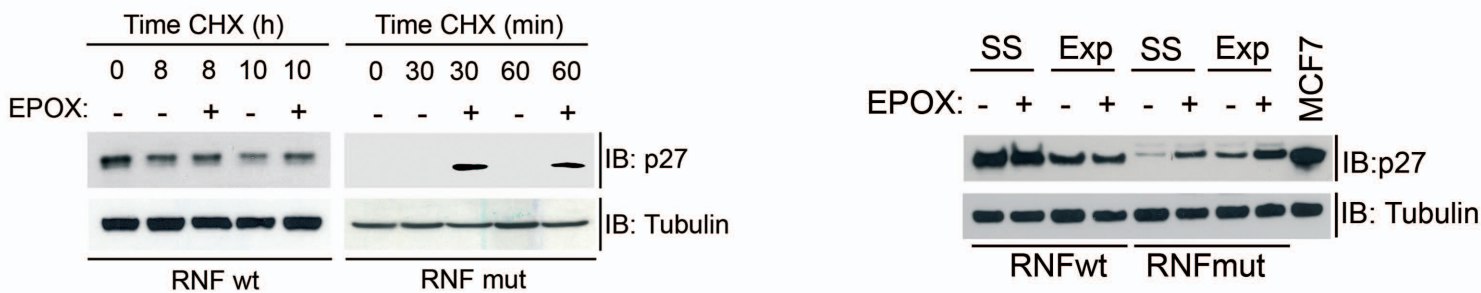

Supplement: MOESM12 [file 9554442]
